# Supplementary material for: Pathways to Low Fertility: 50 Years of Limitation, Curtailment, and Postponement of Childbearing
Source: Springer Nature journal article supplement (doi:10.1007/s13524-019-00848-5), 2020-01-22
Supplement: MOESM1 [file 13524_2019_848_MOESM1_ESM.pdf]

**Online Appendix**  
to  
**Pathways to Low Fertility: 50 Years of Limitation, Curtailment, and Postponement of Childbearing**  
(Published in *Demography*, 57 (2020). DOI: 10.1007/s13524-019-00848-5)

Ian M. Timæus and Tom A. Moultrie

**Table A1** Countries and surveys included in the analysis

| Country              | Region | Sub-region              | Surveys        |           |           |           |           |           |      |      |      |      |  |  |  |
|----------------------|--------|-------------------------|----------------|-----------|-----------|-----------|-----------|-----------|------|------|------|------|--|--|--|
| Afghanistan          | AF     | South & Southeast Asia  | South Asia     | 2015      |           |           |           |           |      |      |      |      |  |  |  |
| Albania              | AL     | Europe & former USSR    |                | 2008-2009 | 2017-2018 |           |           |           |      |      |      |      |  |  |  |
| Angola               | AO     | Africa                  | Middle Africa  | 2015-2016 |           |           |           |           |      |      |      |      |  |  |  |
| Armenia              | AM     | Europe & former USSR    |                | 2000      | 2005      | 2010      | 2015-2016 |           |      |      |      |      |  |  |  |
| Azerbaijan           | AZ     | Europe & former USSR    |                | 2006      |           |           |           |           |      |      |      |      |  |  |  |
| Bangladesh           | BD     | South & Southeast Asia  | South Asia     | 1975*     | 1993-1994 | 1996-1997 | 1999-2000 | 2004      | 2007 | 2011 | 2014 |      |  |  |  |
| Benin                | BJ     | Africa                  | West Africa    | 1981*     | 1996      | 2001      | 2006      | 2011-2012 |      |      |      |      |  |  |  |
| Bolivia              | BO     | Latin America           | South America  | 1989      | 1994      | 1998      | 2003      | 2008      |      |      |      |      |  |  |  |
| Brazil               | BR     | Latin America           | South America  | 1986      | 1991      | 1996      |           |           |      |      |      |      |  |  |  |
| Burkina Faso         | BF     | Africa                  | West Africa    | 1993      | 1998-1999 | 2003      | 2010      |           |      |      |      |      |  |  |  |
| Burundi              | BU     | Africa                  | East Africa    | 1987      | 2010      | 2016-2017 |           |           |      |      |      |      |  |  |  |
| Cambodia             | KH     | South & Southeast Asia  | Southeast Asia | 2000      | 2005      | 2010      | 2014      |           |      |      |      |      |  |  |  |
| Cameroon             | CM     | Africa                  | Middle Africa  | 1978*     | 1991      | 1998      | 2004      | 2011      |      |      |      |      |  |  |  |
| Central African Rep. | CF     | Africa                  | Middle Africa  | 1994-1995 |           |           |           |           |      |      |      |      |  |  |  |
| Chad                 | TD     | Africa                  | Middle Africa  | 1996-1997 | 2004      | 2014-2015 |           |           |      |      |      |      |  |  |  |
| Colombia             | CO     | Latin America           | South America  | 1976*     | 1986      | 1990      | 1995      | 2000      | 2005 | 2010 | 2015 |      |  |  |  |
| Comoros              | KM     | Africa                  | East Africa    | 1996      | 2012      |           |           |           |      |      |      |      |  |  |  |
| Congo (DRC)          | CD     | Africa                  | Middle Africa  | 2007      | 2013-2014 |           |           |           |      |      |      |      |  |  |  |
| Congo (Republic)     | CG     | Africa                  | Middle Africa  | 2005      | 2011-2012 |           |           |           |      |      |      |      |  |  |  |
| Costa Rica           | CR     | Latin America           | Caribbean      | 1976*     | 1993**    |           |           |           |      |      |      |      |  |  |  |
| Côte d'Ivoire        | CI     | Africa                  | West Africa    | 1980*     | 1994      | 1998-1999 | 2011-2012 |           |      |      |      |      |  |  |  |
| Dominican Republic   | DR     | Latin America           | Caribbean      | 1975*     | 1980*     | 1986      | 1991      | 1996      | 1999 | 2002 | 2007 | 2013 |  |  |  |
| Ecuador              | EC     | Latin America           | South America  | 1979*     | 1987      | 1994**    | 1999**    | 2004**    |      |      |      |      |  |  |  |
| Egypt                | EG     | Middle East & N. Africa |                | 1980*     | 1988      | 1992      | 1995      | 2000      | 2005 | 2008 | 2014 |      |  |  |  |
| El Salvador          | ES     | Latin America           | Caribbean      | 1985      | 1998**    | 2003**    | 2008**    |           |      |      |      |      |  |  |  |

| Country         | Region | Sub-region              | Surveys         |           |           |           |           |           |           |      |      |  |
|-----------------|--------|-------------------------|-----------------|-----------|-----------|-----------|-----------|-----------|-----------|------|------|--|
| Ethiopia        | ET     | Africa                  | East Africa     | 2000      | 2005      | 2011      | 2016      |           |           |      |      |  |
| Gabon           | GA     | Africa                  | Middle Africa   | 2000      | 2012      |           |           |           |           |      |      |  |
| The Gambia      | GM     | Africa                  | West Africa     | 2013      |           |           |           |           |           |      |      |  |
| Ghana           | GH     | Africa                  | West Africa     | 1979*     | 1988      | 1993      | 1998      | 2003      | 2008      | 2014 |      |  |
| Guatemala       | GU     | Latin America           | Caribbean       | 1987      | 1995      | 2002**    | 2008**    | 2014-2015 |           |      |      |  |
| Guinea          | GN     | Africa                  | West Africa     | 1999      | 2005      | 2012      |           |           |           |      |      |  |
| Guyana          | GY     | Latin America           | South America   | 1975*     | 2009      |           |           |           |           |      |      |  |
| Haiti           | HT     | Latin America           | Caribbean       | 1977*     | 1994-1995 | 2000      | 2005-2006 | 2012      | 2016-2017 |      |      |  |
| Honduras        | HN     | Latin America           | Caribbean       | 1996**    | 2001**    | 2005-2006 | 2011-2012 |           |           |      |      |  |
| India           | IA     | South & Southeast Asia  | South Asia      | 1992-1993 | 1998-1999 | 2005-2006 | 2015-2016 |           |           |      |      |  |
| Indonesia       | ID     | South & Southeast Asia  | Southeast Asia  | 1976*     | 1987      | 1991      | 1994      | 1997      | 2002-2003 | 2007 | 2012 |  |
| Jordan          | JO     | Middle East & N. Africa |                 | 1976*     | 1990      | 1997      | 2002      | 2007      | 2012      |      |      |  |
| Kazakhstan      | KK     | Europe & former USSR    |                 | 1995      | 1999      |           |           |           |           |      |      |  |
| Kenya           | KE     | Africa                  | East Africa     | 1977*     | 1989      | 1993      | 1998      | 2003      | 2008-2009 | 2014 |      |  |
| Kyrgyz Republic | KY     | Europe & former USSR    |                 | 1997      | 2012      |           |           |           |           |      |      |  |
| Lesotho         | LS     | Africa                  | Southern Africa | 1977*     | 2004      | 2009      | 2014      |           |           |      |      |  |
| Liberia         | LB     | Africa                  | West Africa     | 1986      | 2007      | 2013      |           |           |           |      |      |  |
| Madagascar      | MD     | Africa                  | East Africa     | 1992      | 1997      | 2003-2004 | 2008-2009 |           |           |      |      |  |
| Malawi          | MW     | Africa                  | East Africa     | 1992      | 2000      | 2004      | 2010      | 2015-2016 |           |      |      |  |
| Maldives        | MV     | South & Southeast Asia  | South Asia      | 2009      |           |           |           |           |           |      |      |  |
| Mali            | ML     | Africa                  | West Africa     | 1987      | 1995-1996 | 2001      | 2006      | 2012-2013 |           |      |      |  |
| Mexico          | MX     | Latin America           | Caribbean       | 1976*     | 1987      |           |           |           |           |      |      |  |
| Moldova         | MB     | Europe & former USSR    |                 | 2005      |           |           |           |           |           |      |      |  |
| Morocco         | MA     | Middle East & N. Africa |                 | 1980*     | 1987      | 1992      | 2003-2004 |           |           |      |      |  |
| Mozambique      | MZ     | Africa                  | East Africa     | 1997      | 2003      | 2011      |           |           |           |      |      |  |
| Myanmar         | MM     | South & Southeast Asia  | Southeast Asia  | 2015-2016 |           |           |           |           |           |      |      |  |
| Namibia         | NM     | Africa                  | Southern Africa | 1992      | 2000      | 2006-2007 | 2013      |           |           |      |      |  |
| Nepal           | NP     | South & Southeast Asia  | South Asia      | 1976*     | 1996      | 2001      | 2006      | 2011      | 2016      |      |      |  |
| Nicaragua       | NC     | Latin America           | Caribbean       | 1992**    | 1998      | 2001      | 2006**    |           |           |      |      |  |
| Niger           | NI     | Africa                  | West Africa     | 1992      | 1998      | 2006      | 2012      |           |           |      |      |  |
| Nigeria         | NG     | Africa                  | West Africa     | 1981*     | 1990      | 1999      | 2003      | 2008      | 2013      |      |      |  |
| Pakistan        | PK     | South & Southeast Asia  | South Asia      | 1975*     | 1990-1991 | 2006-2007 | 2012-2013 |           |           |      |      |  |

| Country             | Region | Sub-region              | Surveys         |           |           |           |           |                        |                        |                        |
|---------------------|--------|-------------------------|-----------------|-----------|-----------|-----------|-----------|------------------------|------------------------|------------------------|
| Paraguay            | PY     | Latin America           | South America   | 1979*     | 1990      | 1995**    | 1998**    | 2004**                 | 2008**                 |                        |
| Peru                | PE     | Latin America           | South America   | 1977*     | 1991-1992 | 1996      | 2000      | 2004-2006 <sup>+</sup> | 2009-2012 <sup>+</sup> |                        |
| Philippines         | PH     | South & Southeast Asia  | Southeast Asia  | 1978*     | 1993      | 1998      | 2003      | 2008                   | 2013                   | 2017                   |
| Rwanda              | RW     | Africa                  | East Africa     | 1983*     | 1992      | 2000      | 2005      | 2010                   | 2014-15                |                        |
| São Tomé & Príncipe | ST     | Africa                  | Middle Africa   | 2008-2009 |           |           |           |                        |                        |                        |
| Senegal             | SN     | Africa                  | West Africa     | 1978*     | 1986      | 1992-1993 | 1997      | 2005                   | 2010-2011              | 2012-2017 <sup>+</sup> |
| Sierra Leone        | SL     | Africa                  | West Africa     | 2008      | 2013      |           |           |                        |                        |                        |
| South Africa        | ZA     | Africa                  | Southern Africa | 1998      | 2016      |           |           |                        |                        |                        |
| Sri Lanka           | LK     | South & Southeast Asia  | South Asia      | 1975*     | 1987      |           |           |                        |                        |                        |
| Sudan               | SD     | Middle East & N. Africa |                 | 1978*     | 1989-1990 |           |           |                        |                        |                        |
| Swaziland           | SZ     | Africa                  | Southern Africa | 2006-2007 |           |           |           |                        |                        |                        |
| Tajikistan          | TJ     | Europe & former USSR    |                 | 2012      | 2017      |           |           |                        |                        |                        |
| Tanzania            | TZ     | Africa                  | East Africa     | 1991-1992 | 1996      | 1999      | 2004-2005 | 2010                   | 2015-2016              |                        |
| Thailand            | TH     | South & Southeast Asia  | Southeast Asia  | 1975*     | 1987      |           |           |                        |                        |                        |
| Timor-Leste         | TL     | South & Southeast Asia  | Southeast Asia  | 2009-2010 | 2016      |           |           |                        |                        |                        |
| Togo                | TG     | Africa                  | West Africa     | 1988      | 1998      | 2013-2014 |           |                        |                        |                        |
| Trinidad & Tobago   | TT     | Latin America           | Caribbean       | 1977*     | 1987      |           |           |                        |                        |                        |
| Tunisia             | TN     | Middle East & N. Africa |                 | 1978*     | 1988      |           |           |                        |                        |                        |
| Turkey              | TR     | Middle East & N. Africa |                 | 1975*     | 1993      | 1998      | 2003      |                        |                        |                        |
| Uganda              | UG     | Africa                  | East Africa     | 1988-1989 | 1995      | 2000-2001 | 2006      | 2011                   | 2016                   |                        |
| Ukraine             | UA     | Europe & former USSR    |                 | 2007      |           |           |           |                        |                        |                        |
| Uzbekistan          | UZ     | Europe & former USSR    |                 | 1996      |           |           |           |                        |                        |                        |
| Vietnam             | VN     | South & Southeast Asia  | Southeast Asia  | 1997      | 2002      |           |           |                        |                        |                        |
| Yemen               | YE     | Middle East & N. Africa |                 | 1979*     | 1991-1992 | 2013      |           |                        |                        |                        |
| Zambia              | ZM     | Africa                  | East Africa     | 1992      | 1996      | 2001-2002 | 2007      | 2013-2014              |                        |                        |
| Zimbabwe            | ZW     | Africa                  | East Africa     | 1988      | 1994      | 1999      | 2005-2006 | 2010-2011              | 2015                   |                        |

\*World Fertility Survey \*\*Reproductive Health Survey (all other surveys are Demographic and Health Surveys). <sup>+</sup> Continuous DHS

Parity Progression Ratio

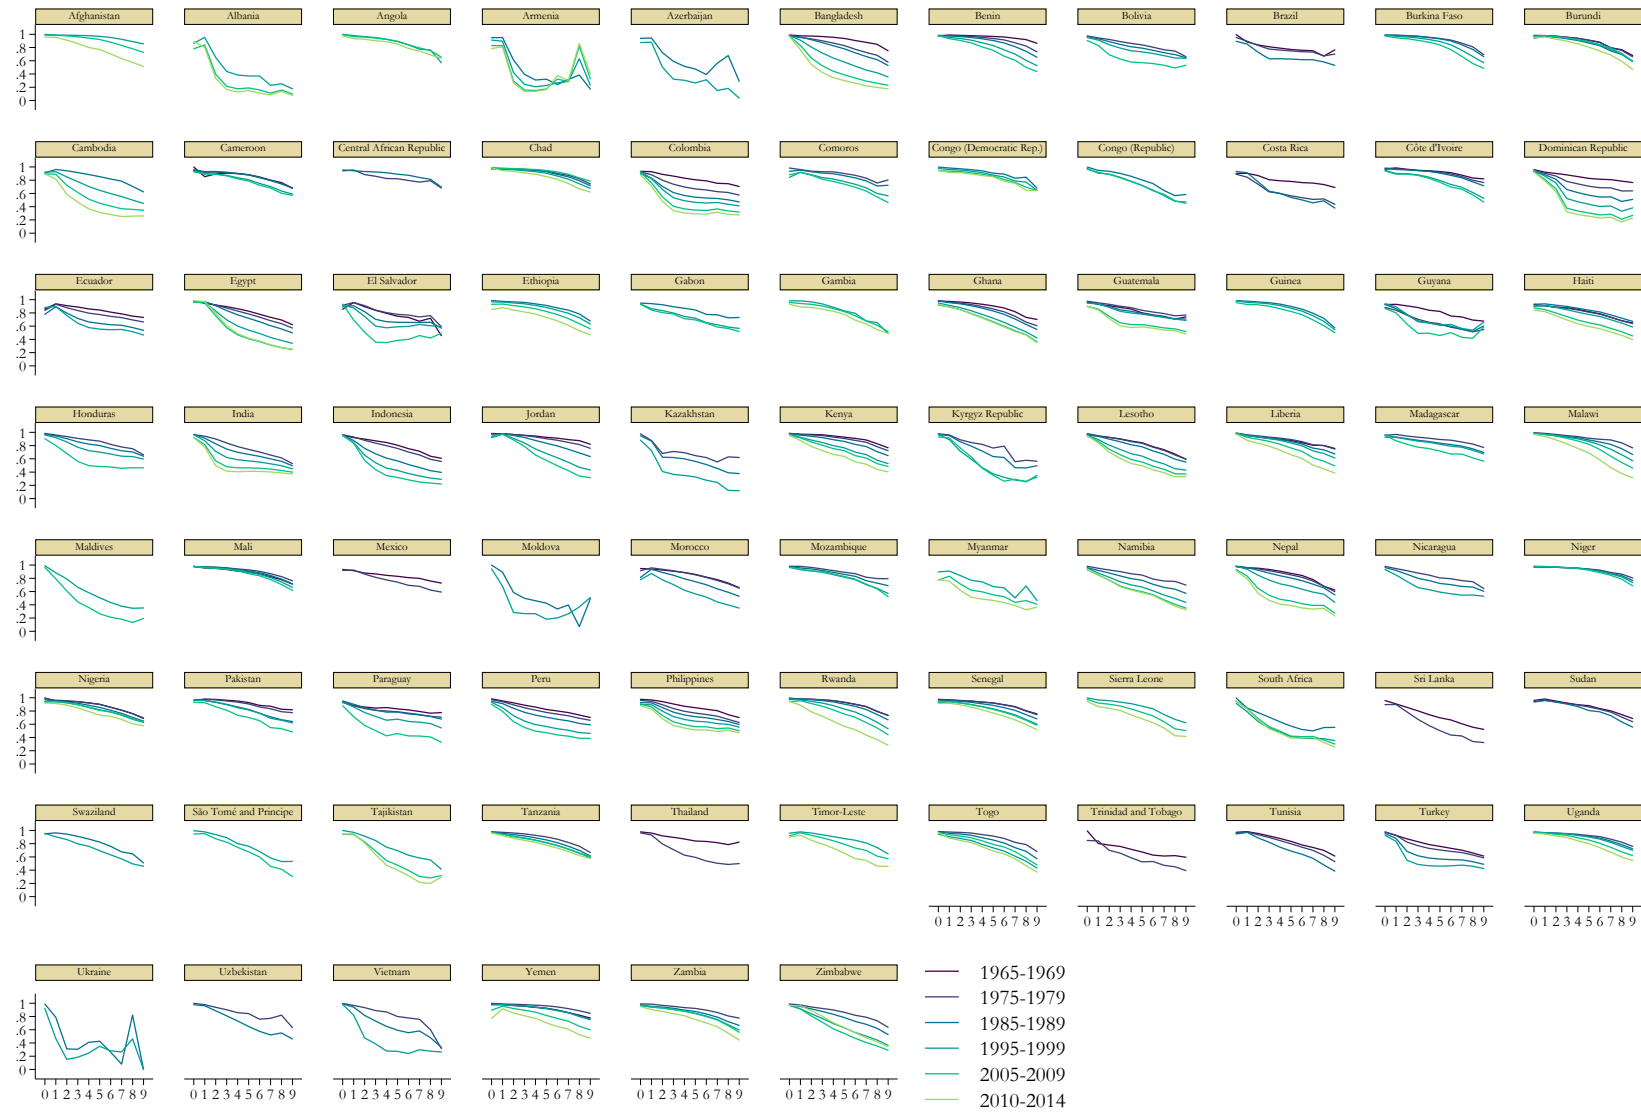

Parity

Fig. A1 Progression ratios according to women's parity by quinquennium in 83 countries

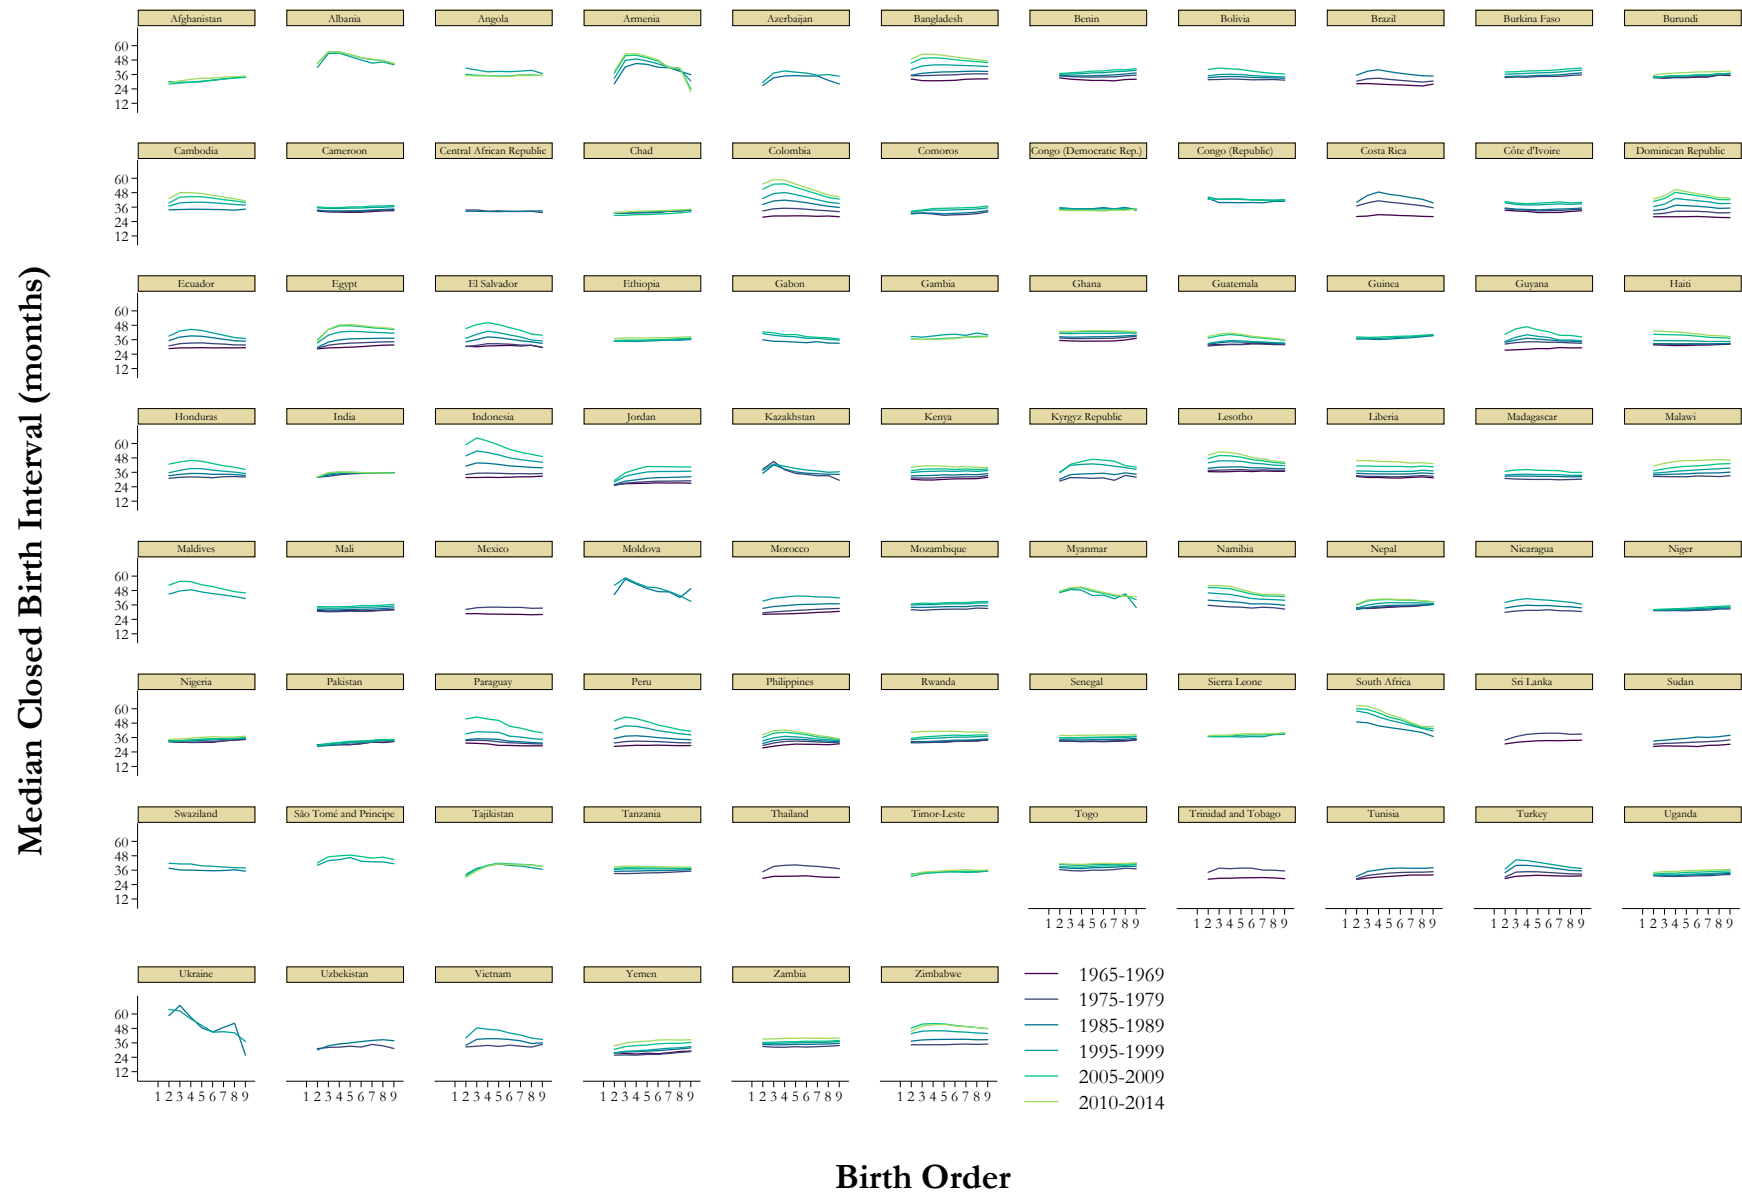

Fig. A2 Median duration of closed birth intervals according to women's parity by quinquennium in 83 countries

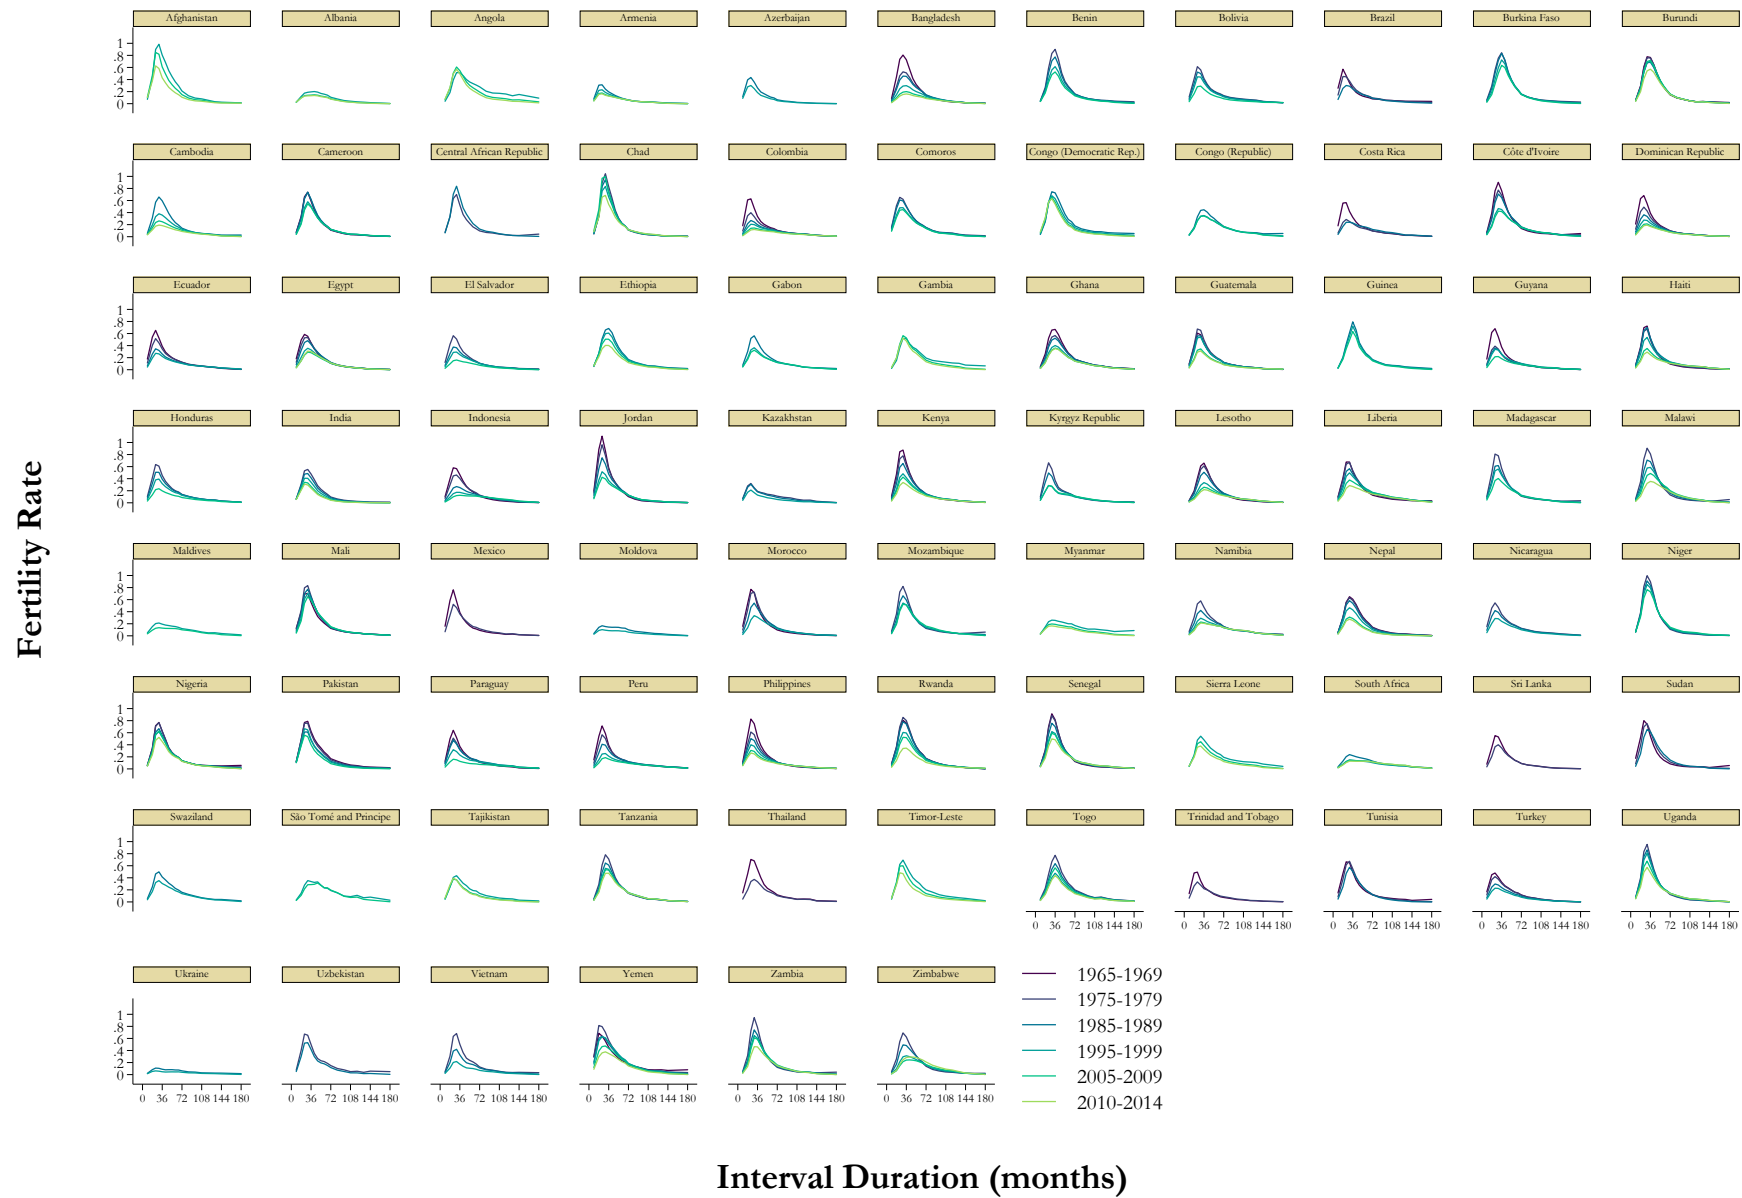

Fig. A3 Duration-specific fertility rates by quinquennium in 83 countries

Proportion of Women Wanting No More Children

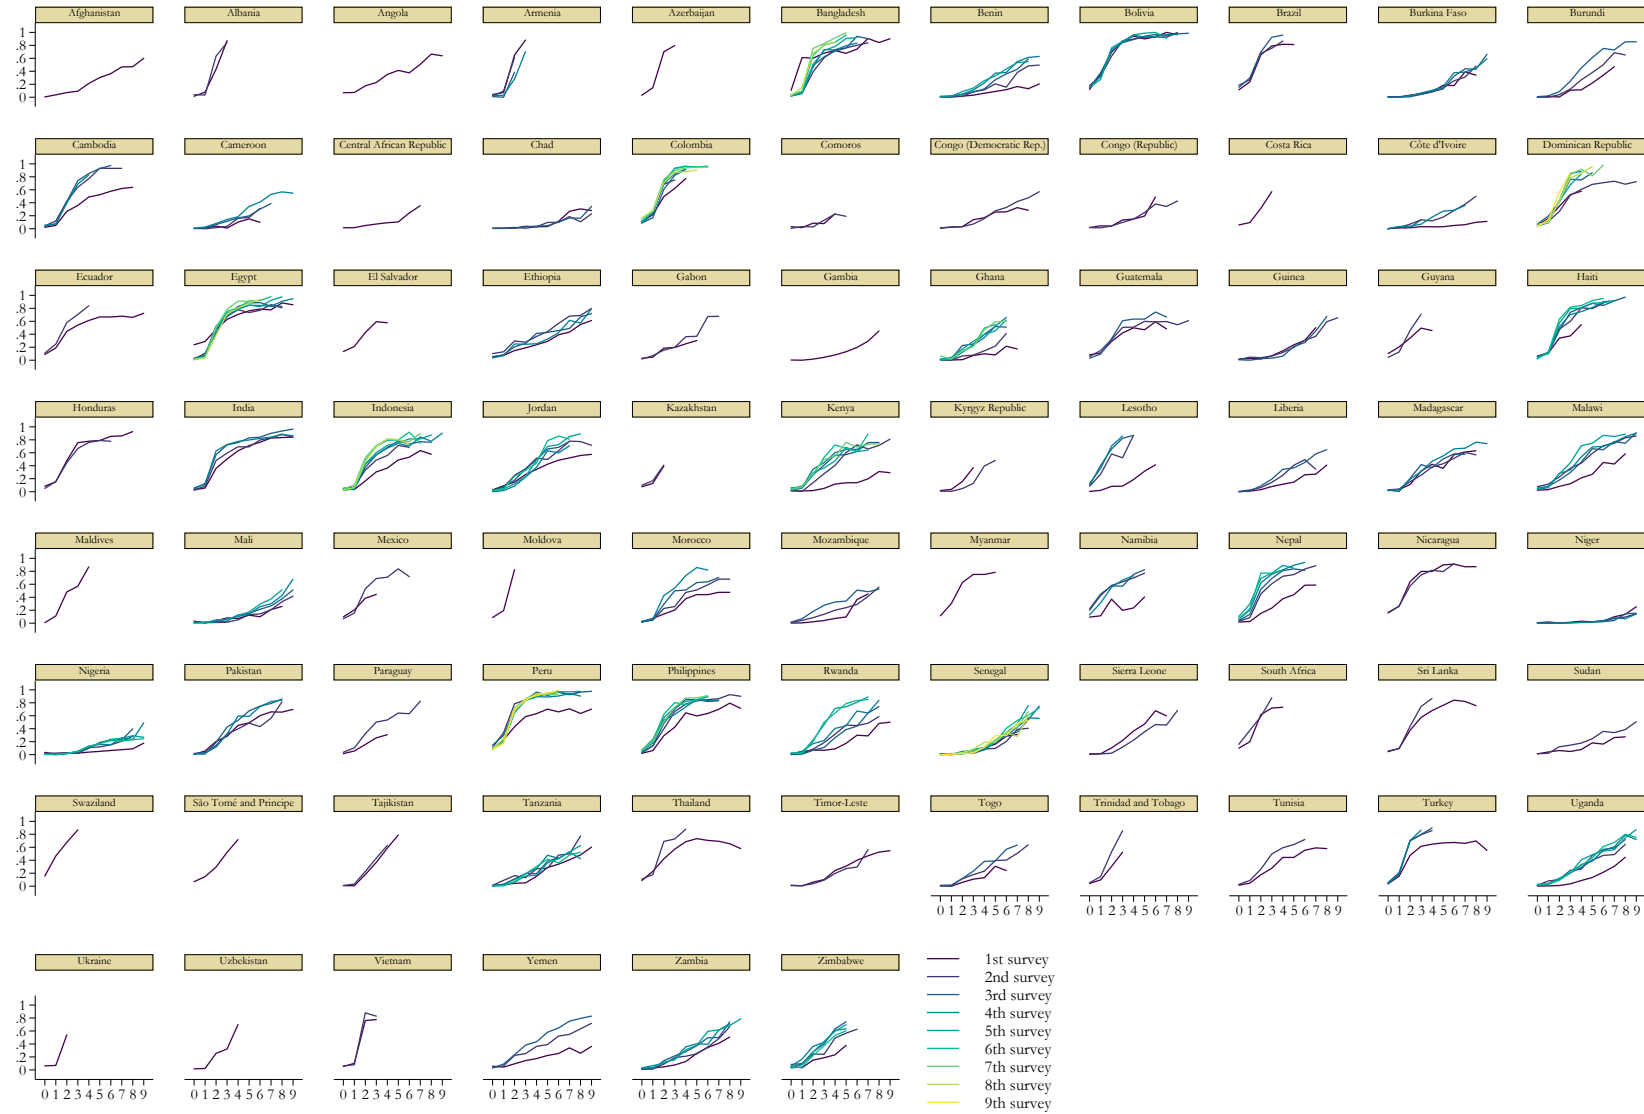

Parity

Fig. A4 Proportions of fertile married women who gave birth in the previous year or were childless reporting that they want no more children according to women's parity by survey in 83 countries (Proportions based on fewer than 50 respondents have been suppressed)
